# Supplementary material
Source: PubMed Central journal article supplement (PMC7486791)

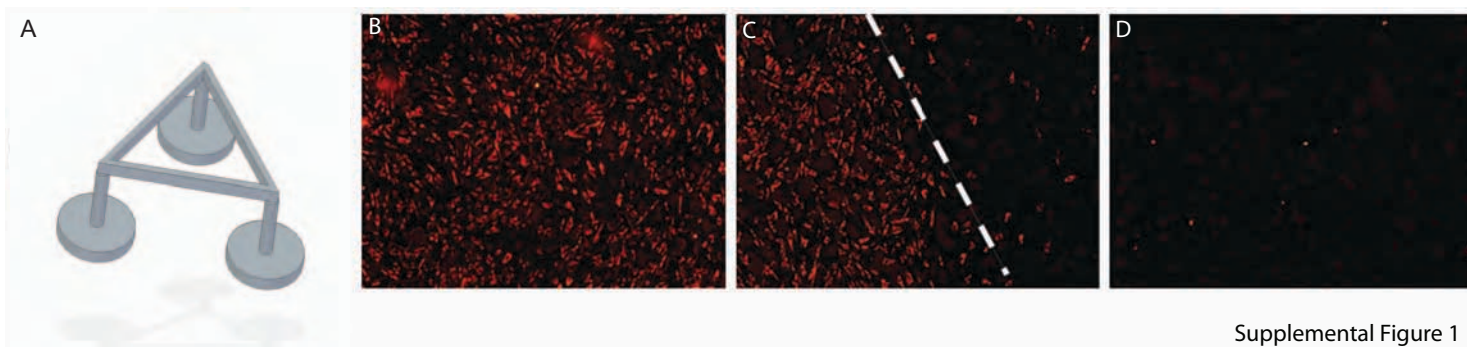

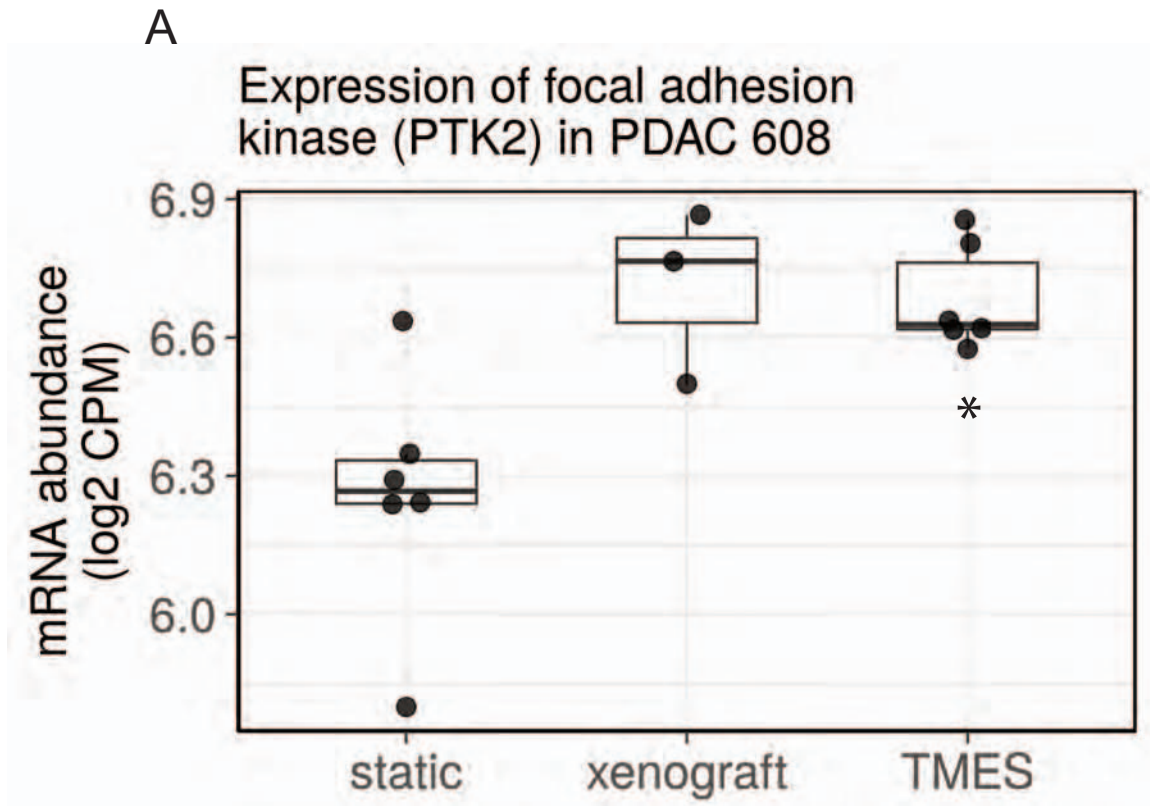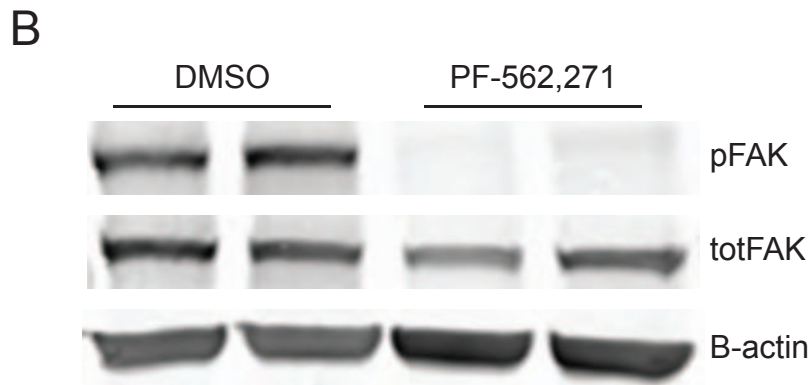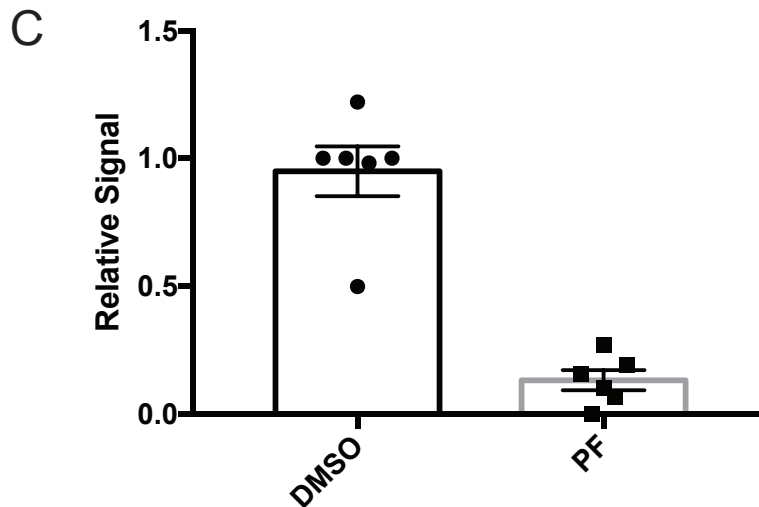

## Differential expression of nucleoside transporters

log<sub>2</sub> FC (static / TMES)  -0.5 0.0 0.5

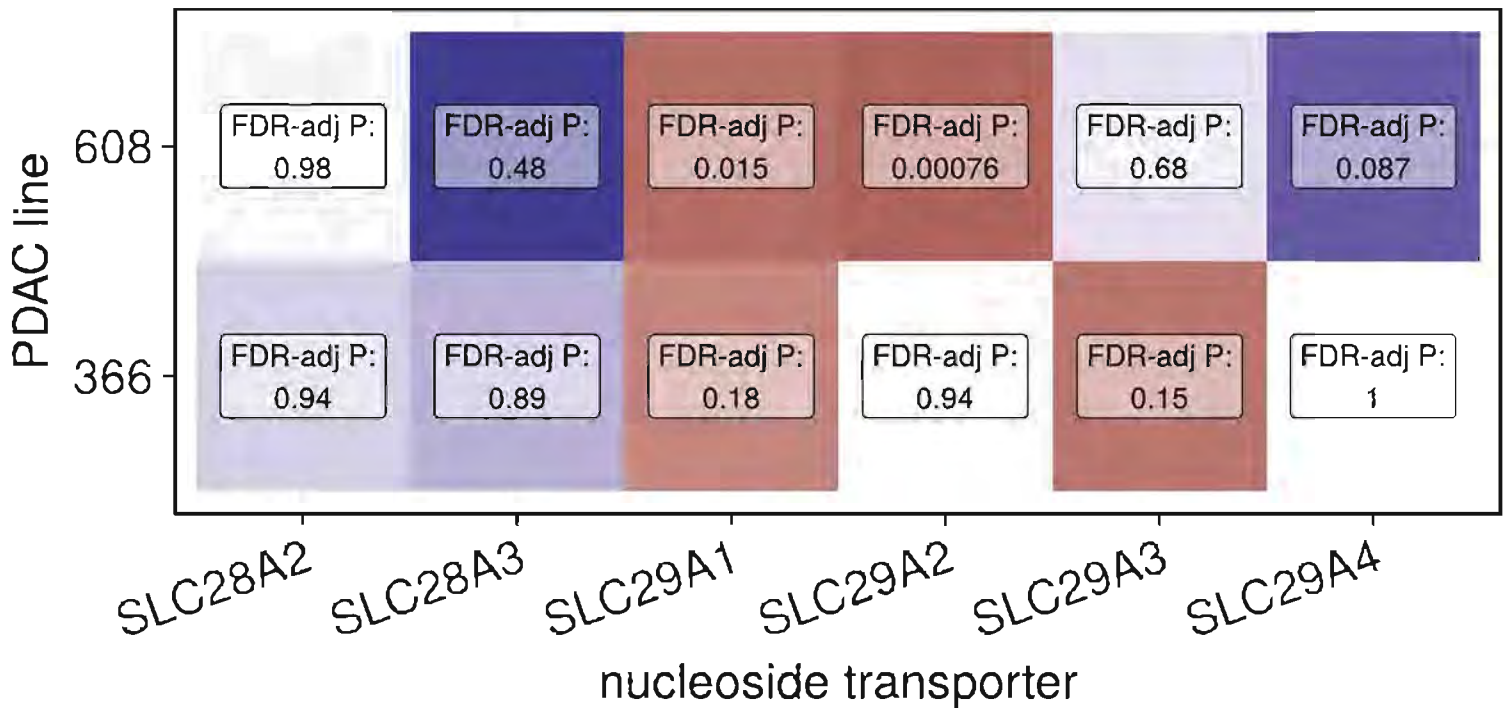

Supplement: NIHMS1622696-supplement-1.pdf [file NIHMS1622696-supplement-1.pdf]
